# Supplementary material for: Study on the Performance of High‐Speed Rail Damage of Four Different Materials
Source: Hindawi journal article supplement (doi:10.1155/2018/5016414), 2018-01-01
Supplement: f1 [file 5016414.f1.xls]

## Sheet: Sheet1
		The hardness before experiment
		The hardness after experiment
		The hardness increasing rate				The hardness before experiment	The hardness after experiment	The hardness increasing rate
					U75V quenching	358.92	378.05	5.3
					U75V hot rolling	346.35	370.08	6.9
					U71Mn quenching	320.69	382	19.1
					U71Mn hot rolling	300.78	363.62	20.9
		PD3 hot rolling
		U71Mn hot rolling
		Line
		curve radius：2000m
		curve radius：1200m
		The wear volume of rail (g)
		vertical load
							kgf/mm2
